# Supplementary material
Source: MDPI journal article supplement (https://www.mdpi.com/2071-1050/9/4/490)
Supplement: s1 [file s1]

**Table S2: List of indicators.**

| Indicator                                                                                    | Description                                                                                                                                                                                                                                      | Scale                                                                                                                                                                                                                                                                                                                                                                                                                                                                                                                                                                                                                                                             | DPSIR category | Subtheme (IMni)                     |
|----------------------------------------------------------------------------------------------|--------------------------------------------------------------------------------------------------------------------------------------------------------------------------------------------------------------------------------------------------|-------------------------------------------------------------------------------------------------------------------------------------------------------------------------------------------------------------------------------------------------------------------------------------------------------------------------------------------------------------------------------------------------------------------------------------------------------------------------------------------------------------------------------------------------------------------------------------------------------------------------------------------------------------------|----------------|-------------------------------------|
| <i>Public / public-private canteens: inclusion of sustainability in mission statement</i>    | Public / public-private canteens commit themselves sustainability in their mission statement.                                                                                                                                                    | <p>0%: Sustainability not mentioned in mission statement / no mission statement.</p> <p>25%: Yes, sustainability mentioned in the mission statement for the whole business (not only catering); at maximum two dimensions are mentioned.</p> <p>50%: Yes, sustainability mentioned in the mission statement for the whole business (not only catering); at maximum three dimensions are mentioned.</p> <p>75%: Yes, sustainability mentioned in the mission statement of the canteen; at maximum two dimensions are mentioned.</p> <p>100%: Yes, sustainability mentioned in the mission statement of the canteen; at maximum three dimensions are mentioned.</p> | Response       | Mission Statement (3)               |
| <i>Local politics and administration: Inclusion of sustainability in city's constitution</i> | The city's constitution mentions sustainable food.                                                                                                                                                                                               | <p>0%: Not mentioned.</p> <p>50%: Either food or sustainability in the city's constitution mentioned.</p> <p>100%: Yes, sustainable food mentioned.</p>                                                                                                                                                                                                                                                                                                                                                                                                                                                                                                           | Response       | Mission Statement (2)               |
| <i>Local politics and administration: Central public procurement department</i>              | A central department is responsible for the quality management relating to public procurement. The department is involved in developing long-term contracts with public-private canteen managers and food suppliers of the local administration. | <p>0%: No central public procurement department which is responsible for contracts relating to food supply/catering.</p> <p>75%: Central public procurement department assists other departments.</p> <p>100%: Central public procurement department assists other departments and undertakes controls.</p>                                                                                                                                                                                                                                                                                                                                                       | Response       | Due Diligence (2), Transparency (1) |

| Indicator                                                                                     | Description                                                                                                      | Scale                                                                                                                                                                                                                                                                                                                                                                                                                                                                                    | DPSIR category | Subtheme (IMni)                                                                              |
|-----------------------------------------------------------------------------------------------|------------------------------------------------------------------------------------------------------------------|------------------------------------------------------------------------------------------------------------------------------------------------------------------------------------------------------------------------------------------------------------------------------------------------------------------------------------------------------------------------------------------------------------------------------------------------------------------------------------------|----------------|----------------------------------------------------------------------------------------------|
| <i>Local politics and administration:</i> <b>Food related topics in sustainability report</b> | Food is mentioned in the city's sustainability report.                                                           | <p>0%: Not mentioned; no sustainability report.</p> <p>25%: Yes, mentioned in one or two dimensions of sustainability.</p> <p>50%: Yes, mentioned in one or two dimensions of sustainability; separate section on food.</p> <p>75%: Yes, mentioned in at least three dimensions of sustainability.</p> <p>100%: Yes, mentioned in at least three dimensions of sustainability; separate section on food.</p>                                                                             | Response       | Holistic Audits (3),<br>Transparency (2),<br>Stakeholder Dialogue (1)                        |
| <i>Local politics and administration:</i> <b>Sustainability report: binding character</b>     | Goals and indicators for a more sustainable urban food system are specified in the city's sustainability report. | <p>0%: The sustainability report doesn't contain food-related indicators and goals; no sustainability report.</p> <p>25%: Mentioning of indicators or goals concerned with sustainable food in other reports of the administration.</p> <p>50%: The sustainability report contains indicators and goals concerned with sustainable food.</p> <p>100%: The sustainability report contains indicators and goals concerned with sustainable food. The indicators show a positive trend.</p> | Response       | Holistic Audits (3),<br>Responsibility (3),<br>Transparency (2),<br>Stakeholder Dialogue (1) |

| Indicator                                                                   | Description                                                                     | Scale                                                                                                                                                                                                                                                                                                                                                                                                                                                                                                                                                                                                                                                       | DPSIR category | Subtheme (IMni)                              |
|-----------------------------------------------------------------------------|---------------------------------------------------------------------------------|-------------------------------------------------------------------------------------------------------------------------------------------------------------------------------------------------------------------------------------------------------------------------------------------------------------------------------------------------------------------------------------------------------------------------------------------------------------------------------------------------------------------------------------------------------------------------------------------------------------------------------------------------------------|----------------|----------------------------------------------|
| <i>Public / public-private canteens: Public access to mission statement</i> | Public access to the canteens' mission statements.                              | <p>0%: No publicly accessible mission statement; no mission statement.</p> <p>25%: Yes, mission statement for the whole business (not only catering) is available on request.</p> <p>50%: Yes, mission statement for the whole business (not only catering) is available online.</p> <p>75%: Yes, mission statement of the canteen (or similar document) is available on request.</p> <p>100%: Yes, mission statement of the canteen (or similar document) is available online.</p>                                                                                                                                                                         | Response       | Transparency (3), Stakeholder Dialogue (1)   |
| <i>Public / public-private canteens: Public access to supplier list</i>     | The public / public-private canteens publish their list of suppliers.           | <p>0%: No publication of supplier lists.</p> <p>25%: Some information on the web page.</p> <p>100%: Yes, supplier lists are published.</p>                                                                                                                                                                                                                                                                                                                                                                                                                                                                                                                  | Response       | Transparency (1), Stakeholder Dialogue (1)   |
| <i>Public / public-private canteens: Public access to raw material list</i> | The public / public-private canteens publish the origin of their raw materials. | <p>0%: No publication of a raw material list; labelling of raw materials complies with law requirements.</p> <p>25%: Yes, the origins of some raw materials are stated and the labelling exceeds the law requirements.</p> <p>50%: Yes, the origins of some raw materials are stated (including certificates and labels) and the labelling exceeds the law requirements.</p> <p>75%: Yes, the origins of most of the raw materials are stated and the labelling exceeds the law requirements.</p> <p>100%: Yes, the origins of most of the raw materials are stated (including certificates and labels) and the labelling exceeds the law requirements.</p> | Response       | Transparency (2,5), Stakeholder Dialogue (1) |

| Indicator                                                                                       | Description                                                                                                                                                                                                                       | Scale                                                                                                                                                                                                                                                                                                                                                                                                                                                                                                                                                                                                                                        | DPSIR category | Subtheme (IMni)                                                                               |
|-------------------------------------------------------------------------------------------------|-----------------------------------------------------------------------------------------------------------------------------------------------------------------------------------------------------------------------------------|----------------------------------------------------------------------------------------------------------------------------------------------------------------------------------------------------------------------------------------------------------------------------------------------------------------------------------------------------------------------------------------------------------------------------------------------------------------------------------------------------------------------------------------------------------------------------------------------------------------------------------------------|----------------|-----------------------------------------------------------------------------------------------|
| <i>Local politics and administration:</i><br><b>Transparency measures</b>                       | The local administration publishes the following:<br>- Laws which concern food related topics<br>- Food-related public spending for initiatives / institutions<br>- Information on food-related educational / information efforts | 0%: No transparency.<br><br>25%: Yes, some information is published.<br><br>75%: Yes, all information is published but difficult to access for the public.<br><br>100%: The city publishes a report containing a description of all food-related activities.                                                                                                                                                                                                                                                                                                                                                                                 | Response       | Transparency (3), Stakeholder Dialogue (2), Conflict Resolution (1)                           |
| <i>Local politics and administration:</i><br><b>participatory platform for sustainable food</b> | The local administration involves representatives from private sector and civil society to discuss questions or decisions relating to sustainable food (food policy council).                                                     | 0%: No institutionalized involvement of actors from outside the administration in the area of sustainable food.<br><br>25%: Project dependent involvement of actors from outside the administration in the area of sustainable food.<br><br>75%: A constant, participatory platform involves actors from outside the administration in the area of sustainable food. The platform has the competences to advise the administration.<br><br>100%: A constant, participatory platform involves actors from outside the administration in the area of sustainable food. The platform has the financial competences to conduct its own projects. | Response       | Transparency (1), Stakeholder Dialogue (3), Grievance Procedures (1), Conflict Resolution (2) |
| <i>Local politics and administration:</i><br><b>ombudsman</b>                                   | The city has an ombudsman who mediates between the administration and the city's dwellers.                                                                                                                                        | 0%: No ombudsman; only certain groups are eligible to consult the ombudsman.<br><br>25%: The city has an ombudsman. But he is embedded in the administration and therefore only partly independent.<br><br>50%: The city has an independent ombudsman, but without the obligation to maintain confidentiality.<br><br>100%: The city has an independent ombudsman with the obligation to maintain confidentiality.                                                                                                                                                                                                                           | Response       | Grievance Procedures (2)                                                                      |

| Indicator                                                                                    | Description                                                                                                                                                                                                                                | Scale                                                                                                                                                                                                                                                                                                                                                           | DPSIR category | Subtheme (IMni)                   |
|----------------------------------------------------------------------------------------------|--------------------------------------------------------------------------------------------------------------------------------------------------------------------------------------------------------------------------------------------|-----------------------------------------------------------------------------------------------------------------------------------------------------------------------------------------------------------------------------------------------------------------------------------------------------------------------------------------------------------------|----------------|-----------------------------------|
| <i>Local politics and administration:</i> <b>agency for food safety and product labeling</b> | The city's administration has an agency which can be contacted to file complaints about food safety and product labeling.                                                                                                                  | 0%: No agency for food safety and product labeling.<br><br>50%: There is an agency for food safety and product labeling but its primary purpose is to enforce law through controls etc. and not to address consumer complaints.<br><br>100%: There is an agency for food safety and product labeling with the purpose to investigate complaints from consumers. | Response       | Grievance Procedures (2)          |
| <i>Local politics and administration:</i> <b>ombudsman: solved cases in the area of food</b> | The city's ombudsman is able to show anonymized cases in the food system which have been resolved successfully.                                                                                                                            | 0%: No cases successfully solved.<br><br>100%: No cases; cases successfully solved.                                                                                                                                                                                                                                                                             | Response       | Conflict Resolution (1)           |
| <i>Local politics and administration:</i> <b>irregularity in the area of food</b>            | Where there irregularities within the last 5 years?<br>- Farmers' direct payments not paid<br>- Neglected controls of food safety<br>- Supply of safe drinking not ensured<br>- Non compliant public-private contracts in the area of food | 0%: Systematic irregularities; no control committee.<br><br>50%: Single cases of irregularities.<br><br>100%: No irregularities.                                                                                                                                                                                                                                | Pressure       | Due Diligence (1), Legitimacy (3) |

| Indicator                                                                                     | Description                                                                                                                                                 | Scale                                                                                                                                                                                                                                                                                                                                                                                                                                                                                                                                                                                                                                                                                                                                  | DPSIR category | Subtheme (IMni)          |
|-----------------------------------------------------------------------------------------------|-------------------------------------------------------------------------------------------------------------------------------------------------------------|----------------------------------------------------------------------------------------------------------------------------------------------------------------------------------------------------------------------------------------------------------------------------------------------------------------------------------------------------------------------------------------------------------------------------------------------------------------------------------------------------------------------------------------------------------------------------------------------------------------------------------------------------------------------------------------------------------------------------------------|----------------|--------------------------|
| <i>Local politics and administration: changes of law in the area of sustainable food</i>      | Changes in law in the last year which lead to a more sustainable food system.                                                                               | <p>0%: No changes in law which lead to a more sustainable food system.</p> <p>25%: Narrow scope, indirect improvements relating to the sustainable food systems.</p> <p>50%: Either narrow scope, direct improvements relating to the sustainable food systems (such as creation of ecological compensation areas on the city's farm) or broad scope, indirect improvements relating to the sustainable food systems.</p> <p>100%: Broad scope, direct improvements relating to the sustainable food systems (numerous individuals, companies affected and sustainable impact expected like in the case of large scale information campaigns, educational initiatives or switch to organic/ fair trade within the administration).</p> | Response       | Civic Responsibility (1) |
| <i>Local politics and administration: lobbying in urban partnerships for sustainable food</i> | The city is member in an urban partnership or network which lobbies for food-related improvements in social and environmental dimensions of sustainability. | <p>0%: No member in an urban partnership or network.</p> <p>50%: Member in an urban partnership or network which lobbies indirectly for food-related improvements in social and environmental dimensions of sustainability.</p> <p>100%: Member in an urban partnership or network which lobbies directly for food-related improvements in social and environmental dimensions of sustainability.</p>                                                                                                                                                                                                                                                                                                                                  | Response       | Civic Responsibility (2) |
| <i>Local politics and administration: lobbying on national level</i>                          | Lobbying of the city towards food-related improvements in social and environmental dimensions of sustainability on the national level.                      | <p>0%: No lobbying.</p> <p>50%: Indirect lobbying for food-related improvements in social and environmental dimensions of sustainability.</p> <p>100%: Direct lobbying for food-related improvements in social and environmental dimensions of sustainability.</p>                                                                                                                                                                                                                                                                                                                                                                                                                                                                     | Response       | Civic Responsibility (2) |

| Indicator                                                                                     | Description                                                                                                                  | Scale                                                                                                                                                                                                                                                                                                                                                              | DPSIR category | Subtheme (IMni)                                                           |
|-----------------------------------------------------------------------------------------------|------------------------------------------------------------------------------------------------------------------------------|--------------------------------------------------------------------------------------------------------------------------------------------------------------------------------------------------------------------------------------------------------------------------------------------------------------------------------------------------------------------|----------------|---------------------------------------------------------------------------|
| <i>Local politics and administration:</i> <b>public pension fund: land resource conflicts</b> | The city's public pension fund considers in its investment guidelines the avoidance of resource-conflicts (land-conflicts).  | 0%: No investment criteria (related directly or indirectly to land-conflicts).<br>25%: General investment guidelines (social- and environmental compliance); no specific mention of resource- or land-conflicts.<br>50%: Investment guidelines which mention of resource-conflicts.<br>100%: Investment guidelines which contain criteria to avoid land-conflicts. | Response       | Due Diligence (2), Civic Responsibility (1), Resource Appropriation (1,5) |
| <i>Local politics and administration:</i> <b>pension fund: water resource conflicts</b>       | The city's public pension fund considers in its investment guidelines the avoidance of resource-conflicts (water-conflicts). | 0%: No investment criteria (related directly or indirectly to land-conflicts).<br>25%: General investment guidelines (social- and environmental compliance); no specific mention of resource- or land-conflicts.<br>50%: Investment guidelines which mention resource-conflicts.<br>100%: Investment guidelines which contain criteria to avoid water-conflicts.   | Response       | Due Diligence (2), Civic Responsibility (1), Resource Appropriation (1,5) |
| <i>Local politics and administration:</i> <b>food strategy with binding character</b>         | The city's food strategy is part of the city's legislation (laws, ordinances etc.)                                           | 0%: No food strategy; not part of the city's legislation.<br>100%: The food strategy is part of the city's legislation.                                                                                                                                                                                                                                            | Response       | Legitimacy (1), Sustainability Management Plan (3)                        |
| <i>Local politics and administration:</i> <b>food in sustainability strategy</b>              | The city's sustainability strategy mentions sustainable food.                                                                | 0%: No sustainability strategy; no mention of food in the sustainability strategy.<br>25%: Single aspects of food are covered but no clear strategy.<br>50%: Single aspects of food are covered with a clear strategical focus.<br>75%: Direct mention of sustainable food.<br>100%: Direct mention of sustainable food with a clear strategical focus.            | Response       | Mission Statement (2), Sustainability Management Plan (3)                 |

| Indicator                                                                                                  | Description                                                                                                                                        | Scale                                                                                                                                                                                                                                                                                     | DPSIR category | Subtheme (IMni)                                                              |
|------------------------------------------------------------------------------------------------------------|----------------------------------------------------------------------------------------------------------------------------------------------------|-------------------------------------------------------------------------------------------------------------------------------------------------------------------------------------------------------------------------------------------------------------------------------------------|----------------|------------------------------------------------------------------------------|
| <i>Local politics and administration:</i> <b>food strategy</b>                                             | The city has a food strategy.                                                                                                                      | 0%: No food strategy.<br>100%: The city has a food strategy.                                                                                                                                                                                                                              | Response       | Mission Statement (2), Sustainability Management Plan (2)                    |
| <i>Local politics and administration:</i> <b>external costs food</b>                                       | The city estimates the external costs which are caused by the urban food consumption. The study identifies the main drivers of the external costs. | 0%: No estimate on external costs of urban food consumption.<br>100%: Estimate on external costs of urban food consumption.                                                                                                                                                               | Response       | Due Diligence (2), Responsibility (2), Full-Cost Accounting (3)              |
| <i>Public / public-private canteens:</i> <b>measures seasonal food</b>                                     | The public / public-private canteens undertake measures in regard to seasonal food.                                                                | 0%: No measures.<br>100%: Buying of seasonal vegetables and fruits.                                                                                                                                                                                                                       | Response       | Greenhouse Gases (3), Air Quality (2), Energy Use (2), Local Procurement (1) |
| <i>Public / public-private canteens:</i> <b>measures climate friendly transport and canteen operations</b> | The public / public-private canteens undertake measures to make transports and canteen operation more climate friendly.                            | 0%: No measures.<br>50%: Measures relating to climate-friendly transport.<br>100%: Measures to optimize canteen operations.                                                                                                                                                               | Response       | Greenhouse Gases (2), Air Quality (1), Energy Use (1)                        |
| <i>Local politics and administration:</i> <b>measures seasonal food</b>                                    | The city undertakes measures to promote the consumption of seasonal food (e.g. awareness rising, criteria in public procurement etc.).             | 0%: No measures undertaken.<br>50%: Yes, narrow-scope measures undertaken.<br>75%: Yes, broad-scope measures relating to information and awareness rising; in single cases, criteria are defined in public procurement.<br>100%: Criteria are defined in all cases of public procurement. | Response       | Greenhouse Gases (3), Air Quality (2), Energy Use (2), Local Procurement (1) |



| Indicator                                                                       | Description                                                                                                                                       | Scale                                                                                                                                                                                                                                                                                                 | DPSIR category | Subtheme (IMni)                                                                                                         |
|---------------------------------------------------------------------------------|---------------------------------------------------------------------------------------------------------------------------------------------------|-------------------------------------------------------------------------------------------------------------------------------------------------------------------------------------------------------------------------------------------------------------------------------------------------------|----------------|-------------------------------------------------------------------------------------------------------------------------|
| <i>Local politics and administration:</i> <b>measures climate friendly food</b> | The city undertakes measures relating to climate-friendly transport and optimization of canteen operations (e.g. criteria in public procurement). | 0%: No measures.<br><br>50%: Measures relating to climate-friendly transport.<br><br>100%: Measures to optimize canteen operations.                                                                                                                                                                   | Response       | Greenhouse Gases (2), Air Quality (1), Energy Use (1)                                                                   |
| <i>Public / public-private canteens:</i> <b>measures meatless meals</b>         | The public / public-private canteens undertake measures to reduce meat consumption (e.g. vegetarian menu).                                        | 0%: No measures.<br><br>75%: Daily vegetarian menu.<br><br>100%: Vegetarian day (with no meat/fish menu available); further education for cooks in vegetarian/vegan diet.                                                                                                                             | Response       | Greenhouse Gases (3), Air Quality (2), Water Withdrawal (1), Energy Use (1), Animal Health (1), Freedom from Stress (1) |
| <i>Local politics and administration:</i> <b>measures meatless meals</b>        | The city undertakes measures to promote the reduction of meat consumption (e.g. public awareness rising).                                         | 0%: No measures undertaken.<br><br>50%: Yes, narrow-scope measures undertaken.<br><br>75%: Yes, broad-scope measures relating to information and awareness rising; in single cases, criteria are defined in public procurement.<br><br>100%: Criteria are defined in all cases of public procurement. | Response       | Greenhouse Gases (3), Air Quality (2), Energy Use (1), Animal Health (1), Freedom from Stress (1)                       |

| Indicator                                                                             | Description                                                                                                                               | Scale                                                                                                                                                                                                                                                                                                                                                                                                                                                                                                                                                                                                                                                                                                                                                                                    | DPSIR category | Subtheme (IMni)                                       |
|---------------------------------------------------------------------------------------|-------------------------------------------------------------------------------------------------------------------------------------------|------------------------------------------------------------------------------------------------------------------------------------------------------------------------------------------------------------------------------------------------------------------------------------------------------------------------------------------------------------------------------------------------------------------------------------------------------------------------------------------------------------------------------------------------------------------------------------------------------------------------------------------------------------------------------------------------------------------------------------------------------------------------------------------|----------------|-------------------------------------------------------|
| <i>Local politics and administration:</i> <b>promotion of low emission transports</b> | The local politics created incentives to buy transport vehicles with particle filters and compliance with stricter emission standards.    | 0%: No incentives.<br><br>25%: <=25% difference in vehicle tax between vehicles between the vehicles complying with the least strict and the strictest emission standard (basis: heaviest vehicle category)<br><br>50%: <=50% difference in vehicle tax between vehicles between the vehicles complying with the least strict and the strictest emission standard (basis: heaviest vehicle category)<br><br>75%: <=75% difference in vehicle tax between vehicles between the vehicles complying with the least strict and the strictest emission standard (basis: heaviest vehicle category)<br><br>100%: <=100% difference in vehicle tax between vehicles between the vehicles complying with the least strict and the strictest emission standard (basis: heaviest vehicle category) | Response       | Greenhouse Gases (1), Air Quality (3), Energy Use (1) |
| <i>Local politics and administration:</i> <b>promotion of low emission manuring</b>   | The local politics created incentives for farmers to reduce air polluting emission due to manuring (e.g. by financing drag hose systems). | 0%: No incentives.<br><br>50%: Yes, by building capacity or rising awareness.<br><br>100%: Yes, by financial support (in addition to national subsidies)                                                                                                                                                                                                                                                                                                                                                                                                                                                                                                                                                                                                                                 | Response       | Greenhouse Gases (2), Air Quality (3)                 |
| <i>Public / public-private canteens:</i> <b>measures water footprint meals</b>        | The public / public-private canteens undertake measures to reduce the food-related water footprint.                                       | 0%: No measures undertaken.<br><br>50%: Measures undertaken by optimizing canteen operations.<br><br>100%: The water footprint is considered when buying food or when planning the menu, respectively.                                                                                                                                                                                                                                                                                                                                                                                                                                                                                                                                                                                   | Response       | Water Withdrawal (3)                                  |

| Indicator                                                                                                    | Description                                                                                                                                                | Scale                                                                                                                                                                                                                                                                                                                         | DPSIR category | Subtheme (IMni)                                                                                                                                                                                                                   |
|--------------------------------------------------------------------------------------------------------------|------------------------------------------------------------------------------------------------------------------------------------------------------------|-------------------------------------------------------------------------------------------------------------------------------------------------------------------------------------------------------------------------------------------------------------------------------------------------------------------------------|----------------|-----------------------------------------------------------------------------------------------------------------------------------------------------------------------------------------------------------------------------------|
| <i>Local politics and administration:</i> <b>measures water footprint food</b>                               | Measures of the local administration to reduce the food-related water footprint (e.g. by promoting the water footprint calculation in the private sector). | 0%: No measures are undertaken.<br>50%: Measures to raise awareness.<br>100%: Incentives to reduce the food-related water footprint.                                                                                                                                                                                          | Response       | Water Withdrawal (2)                                                                                                                                                                                                              |
| <i>Local politics and administration:</i> <b>share of connected household to waste water treatment plant</b> | Share of the households which are connected to a waste water treatment plant.                                                                              | [Indicator rating in %] = [% of households connected to WWTP]                                                                                                                                                                                                                                                                 | Response       | Water Quality (3), Ecosystem Diversity (1), Species Diversity (1), Public Health (2)                                                                                                                                              |
| <i>Public / public-private canteens:</i> <b>promotion of organic agriculture</b>                             | The public / public-private canteens promote organic agriculture by buying organic products / raw materials.                                               | 0%: No purchasing of organic products / raw materials.<br>25%: < 25 % of products / raw materials are certified organic.<br>50%: < 50% of products / raw materials are certified organic.<br>75%: < 75% of products / raw materials are certified organic.<br>100%: <=100% of products / raw materials are certified organic. | Response       | Water Quality (3), Soil Quality (3), Land Degradation (1), Ecosystem Diversity (1), Species Diversity (3), Genetic Diversity (1), Energy Use (2), Freedom from Stress (3), Food Safety (1), Food Quality (1,5), Public Health (1) |

| Indicator                                                                            | Description                                                                                                                                                                                                                                                                           | Scale                                                                                                                                                                                                     | DPSIR category | Subtheme (IMni)                                                                                                                                                                                                                                             |
|--------------------------------------------------------------------------------------|---------------------------------------------------------------------------------------------------------------------------------------------------------------------------------------------------------------------------------------------------------------------------------------|-----------------------------------------------------------------------------------------------------------------------------------------------------------------------------------------------------------|----------------|-------------------------------------------------------------------------------------------------------------------------------------------------------------------------------------------------------------------------------------------------------------|
| <i>Local politics and administration: <b>promotion of organic agriculture</b></i>    | The local administration promotes organic agriculture by:<br>- offering organic meals in its canteens<br>- supporting organic farmers (only local subsidies)<br>- supporting conservation tillage or similar methods (only local subsidies)<br>- building capacity in organic farming | 0%: No measures.<br><br>50%: Single measures in one domain.<br><br>75%: Strategic measures in one domain<br><br>100%: Several measures in different domains.                                              | Response       | Water Quality (3), Soil Quality (3), Land Degradation (1), Ecosystem Diversity (1), Species Diversity (3), Genetic Diversity (1), Energy Use (2), Freedom from Stress (3), Community Investment (1), Food Safety (1), Food Quality (1,5), Public Health (1) |
| <i>Local politics and administration: <b>promotion of urban densification</b></i>    | The local administration promotes urban densification to avoid land being lost for food production (by means of spatial planning or regulations concerning public or subsidized housing).                                                                                             | 0%: No measures or strategy.<br><br>50%: Existing strategy or measures in the area of public / subsidized housing.<br><br>100%: Existing strategy or measures in the area of public / subsidized housing. | Response       | Land Degradation (3)                                                                                                                                                                                                                                        |
| <i>Local politics and administration: <b>promotion of landscape connectivity</b></i> | The local administration promotes actively the landscape connectivity in agriculture.                                                                                                                                                                                                 | 0%: No measures.<br><br>50%: Single measures in one domain.<br><br>75%: Strategic measures in one domain<br><br>100%: Several measures in different domains.                                              | Response       | Ecosystem Diversity (3), Species Diversity (2)                                                                                                                                                                                                              |

| Indicator                                                                                         | Description                                                                                                                                                                   | Scale                                                                                                                                                                                                                                                               | DPSIR category | Subtheme (IMni)       |
|---------------------------------------------------------------------------------------------------|-------------------------------------------------------------------------------------------------------------------------------------------------------------------------------|---------------------------------------------------------------------------------------------------------------------------------------------------------------------------------------------------------------------------------------------------------------------|----------------|-----------------------|
| <i>Public / public-private canteens:</i> <b>promotion of species diversity</b>                    | The public / public-private canteens promote species diversity (e.g. by having internal rules on buying only fish from sustainable fisheries).                                | 0%: No measures relating to species diversity.<br>25%: One measure, but no completely implemented.<br>50%: One measure, completely implemented.<br>75%: Two measures relating to species diversity.<br>100%: At least three measures relating to species diversity. | Response       | Species Diversity (3) |
| <i>Local politics and administration:</i> <b>promotion of species diversity in agriculture</b>    | The local administration promotes species diversity in agriculture.                                                                                                           | 0%: No measures.<br>50%: Single measures in one domain.<br>75%: Strategic measures in one domain<br>100%: Several measures in different domains.                                                                                                                    | Response       | Species Diversity (3) |
| <i>Local politics and administration:</i> <b>promotion of species in urban gardens</b>            | The local administration promotes species diversity in urban allotment and private gardens (e.g. by banning pesticides, or by providing seedlings of rare species/varieties). | 0%: No measures.<br>50%: Studies on the species diversity in gardens.<br>75%: Awareness rising measures like publishing brochures, trainings etc.<br>100%: Concrete projects which involve private gardeners directly.                                              | Response       | Species Diversity (2) |
| <i>Public / public-private canteens:</i> <b>exclusion of GMO (genetically modified organisms)</b> | The public / public-private canteens exclude GMO by listing only suppliers who guarantee for GMO-free products or non GMO raw materials.                                      | 0%: No exclusion of GMO raw materials or products containing GMO.<br>100%: Exclusion of GMO raw materials or products containing GMO.                                                                                                                               | Response       | Genetic Diversity (2) |

| Indicator                                                                                       | Description                                                                                                                             | Scale                                                                                                                                                                                                                                                                | DPSIR category | Subtheme (IMni)                                  |
|-------------------------------------------------------------------------------------------------|-----------------------------------------------------------------------------------------------------------------------------------------|----------------------------------------------------------------------------------------------------------------------------------------------------------------------------------------------------------------------------------------------------------------------|----------------|--------------------------------------------------|
| <i>Public / public-private canteens:</i> <b>promotion of diversity of breeds and varieties</b>  | The public / public-private canteens promote genetic diversity (e.g. by buying rare varieties or breeds).                               | 0%: No measures relating to genetic diversity.<br>50%: One measure, but no completely implemented.<br>75%: One measure, completely implemented.<br>100%: Two measures relating to genetic diversity.<br>100%: At least three measures relating to genetic diversity. | Response       | Genetic Diversity (1,5)                          |
| <i>Local politics and administration:</i> <b>promotion of diversity of breeds and varieties</b> | The local administration promotes genetic diversity in agriculture (e.g. by growing seedlings of rare varieties for allotment gardens). | 0%: No measures.<br>50%: Single measures in one domain.<br>75%: Strategic measures in one domain<br>100%: Several measures in different domains.                                                                                                                     | Response       | Genetic Diversity (1)                            |
| <i>Local politics and administration:</i> <b>waste disposal charge</b>                          | The local administration has implemented a waste disposal charge.                                                                       | 0%: No waste disposal charge.<br>100%: Waste disposal charge implemented.                                                                                                                                                                                            | Response       | Material Use (2)                                 |
| <i>Local politics and administration:</i> <b>recycling points</b>                               | The city has a dense network of recycling points.                                                                                       | 0%: No recycling points; only a few recycling points.<br>100%: Dense network of recycling points.                                                                                                                                                                    | Response       | Material Use (3), Waste Reduction & Disposal (3) |

| Indicator                                                                                     | Description                                                                                                                                                                                                      | Scale                                                                                                                                                                               | DPSIR category | Subtheme (IMni)                                                                                                                                                                                                                                                 |
|-----------------------------------------------------------------------------------------------|------------------------------------------------------------------------------------------------------------------------------------------------------------------------------------------------------------------|-------------------------------------------------------------------------------------------------------------------------------------------------------------------------------------|----------------|-----------------------------------------------------------------------------------------------------------------------------------------------------------------------------------------------------------------------------------------------------------------|
| <i>Local politics and administration:</i> <b>promotion of energy recovery from food waste</b> | The local administration promotes the energy recovery from food waste that is produced within the city's boundaries (e.g. by operating its own bioenergy plant or by supporting projects of the private sector). | 0%: No measures.<br><br>100%: Measures promoting the energy recovery from food waste.                                                                                               | Response       | Material Use (2), Energy Use (3), Waste Reduction & Disposal (1)                                                                                                                                                                                                |
| <i>Local politics and administration:</i> <b>promotion of composting</b>                      | The city promotes the composting of food waste that is produced within the city's boundaries.                                                                                                                    | 0%: No measures.<br><br>50%: Awareness rising.<br><br>100%: Incentives for composting food waste like central compost containers or subsidizing smaller/private compost containers. | Response       | Material Use (2), Waste Reduction & Disposal (1)                                                                                                                                                                                                                |
| <i>Local politics and administration:</i> <b>promotion of reduction of food waste</b>         | Food losses are minimized by awareness rising and implementation of concrete measures.                                                                                                                           | 0%: No measures.<br><br>50%: Awareness rising.<br><br>100%: Promotion of the use of food which cannot be sold anymore in supermarket.                                               | Response       | Greenhouse Gases (1), Air Quality (1), Water Withdrawal (1), Water Quality (1), Soil Quality (1), Land Degradation (1), Ecosystem Diversity (1), Species Diversity (1), Genetic Diversity (1), Material Use (1), Energy Use (1), Waste Reduction & Disposal (3) |

| Indicator                                                                                          | Description                                                                                                                   | Scale                                                                                                                                                                                                                                                                                                                                                                                                | DPSIR category | Subtheme (IMni)                                                                                                                                                                                                                                                 |
|----------------------------------------------------------------------------------------------------|-------------------------------------------------------------------------------------------------------------------------------|------------------------------------------------------------------------------------------------------------------------------------------------------------------------------------------------------------------------------------------------------------------------------------------------------------------------------------------------------------------------------------------------------|----------------|-----------------------------------------------------------------------------------------------------------------------------------------------------------------------------------------------------------------------------------------------------------------|
| <i>Public / public-private canteens:</i> <b>reduction of food waste</b>                            | The public / public-private canteens undertake measures to reduce food waste.                                                 | <p>0%: No measures; measures only connected to calculating the purchasing amounts as precise as possible.</p> <p>50%: Some measures relating to re-use (staff takes leftovers home; boxes to take food home in schools; giving away of leftovers to social institutions)</p> <p>100%: Advanced measures relating to prevention of food waste (concept, monitoring, instant preparation of meals)</p> | Response       | Greenhouse Gases (1), Air Quality (1), Water Withdrawal (1), Water Quality (1), Soil Quality (1), Land Degradation (1), Ecosystem Diversity (1), Species Diversity (1), Genetic Diversity (1), Material Use (1), Energy Use (1), Waste Reduction & Disposal (3) |
| <i>Public / public-private canteens:</i> <b>promotion of animal welfare (health)</b>               | The public / public-private canteens promote animal welfare (animal health) by applying criteria when buying animal products. | <p>0%: No buying criteria.</p> <p>50%: General buying criteria.</p> <p>100%: Buying criteria which focus on animal welfare (animal health).</p>                                                                                                                                                                                                                                                      | Response       | Animal Health (2)                                                                                                                                                                                                                                               |
| <i>Local politics and administration:</i> <b>promotion of animal welfare (health)</b>              | The local administration offers trainings to farmers relating to animal welfare (animal health).                              | <p>0%: No trainings.</p> <p>50%: Some trainings (1-2 per year)</p> <p>100%: Regular trainings (<math>\geq 3</math> trainings per year)</p>                                                                                                                                                                                                                                                           | Response       | Animal Health (2)                                                                                                                                                                                                                                               |
| <i>Local politics and administration:</i> <b>promotion of animal welfare (freedom from stress)</b> | The local administration offers trainings to farmers relating to animal welfare (freedom from stress).                        | <p>0%: No trainings.</p> <p>50%: Some trainings (1-2 per year)</p> <p>100%: Regular trainings (<math>\geq 3</math> trainings per year)</p>                                                                                                                                                                                                                                                           | Response       | Freedom from Stress (2)                                                                                                                                                                                                                                         |



| Indicator                                                                                              | Description                                                                                                                                                                             | Scale                                                                                                                                                                                                                                          | DPSIR category | Subtheme (IMni)                                              |
|--------------------------------------------------------------------------------------------------------|-----------------------------------------------------------------------------------------------------------------------------------------------------------------------------------------|------------------------------------------------------------------------------------------------------------------------------------------------------------------------------------------------------------------------------------------------|----------------|--------------------------------------------------------------|
| <i>Local politics and administration:</i> <b>animal welfare statistics</b>                             | The local administration publishes statistics relating to animal welfare controls.                                                                                                      | 0%: No publication of animal welfare statistics.<br>50%: Some figures are published.<br>100%: All case numbers of insufficient animal welfare are published.                                                                                   | Response       | Transparency (1), Animal Health (1), Freedom from Stress (1) |
| <i>Public / public-private canteens:</i> <b>promotion of animal welfare (freedom from stress)</b>      | The public / public-private canteens promote animal welfare (freedom from stress) by applying criteria when buying animal products.                                                     | 0%: No buying criteria.<br>50%: General buying criteria.<br>100%: Buying criteria which focus on animal welfare (freedom from stress)                                                                                                          | Response       | Freedom from Stress (2)                                      |
| <i>Local politics and administration:</i> <b>measures sustainable food</b>                             | The local administration has implemented measures relating to sustainable food during the last five years (e.g. organizing of farmer's markets, more sustainable food procurement etc.) | 0%: No measures.<br>25%: Measures in one sustainability dimension.<br>50%: Measures in two sustainability dimensions.<br>75%: Measures in three sustainability dimensions.<br>100%: More than ten measures in three sustainability dimensions. | Response       | Internal Investment (2), Community Investment (1)            |
| <i>Local politics and administration:</i> <b>promotion of research in the area of sustainable food</b> | The city's public educational institutions commit resources to sustainability-related research in the area of food.                                                                     | 0%: No resources committed to sustainability-related research in the area of food.<br>100%: Resources committed to sustainability-related research in the area of food.                                                                        | Response       | Community Investment (2), Capacity Development (1)           |

| Indicator                                                                                  | Description                                                                                                                                                         | Scale                                                                                                                                                                                                                                                                         | DPSIR category | Subtheme (IMni)                                 |
|--------------------------------------------------------------------------------------------|---------------------------------------------------------------------------------------------------------------------------------------------------------------------|-------------------------------------------------------------------------------------------------------------------------------------------------------------------------------------------------------------------------------------------------------------------------------|----------------|-------------------------------------------------|
| <i>Local politics and administration:</i> <b>promotion of stability of food production</b> | The local administration promotes the resilience of regional food production in all dimensions of sustainability.                                                   | 0%: No promotion of the resilience of regional food production.<br>50%: Trainings offered in one dimension of sustainability.<br>75%: Trainings offered in two dimension of sustainability.<br>100%: Trainings offered in three dimension of sustainability.                  | Response       | Stability of Production (3), Value Creation (2) |
| <i>Local politics and administration:</i> <b>drinking water in case of emergency</b>       | The city has a concept and mobile infrastructure to avoid drinking water shortages in case of emergency. The competencies for emergency relief are clearly defined. | 0%: No precautions.<br>50%: Central agency to coordinate emergency relief; mobile infrastructure available.<br>100%: Concept for emergency relief.                                                                                                                            | Response       | Risk Management (3)                             |
| <i>Local politics and administration:</i> <b>food in case of emergency</b>                 | The city has a concept to avoid food shortages in case of emergency. The competencies for emergency relief are clearly defined.                                     | 0%: No precautions.<br>50%: Central agency to coordinate emergency relief.<br>100%: Concept for emergency relief.                                                                                                                                                             | Response       | Risk Management (3)                             |
| <i>Local politics and administration:</i> <b>food safety controls</b>                      | The local administration controls safety of food products at all points of sale (retail, whole sale, gastronomy, direct marketing).                                 | 0%: No controls.<br>50%: Controls are conducted but without clear methodology.<br>75%: Controls are conducted with clear methodology (e.g. risk-based approaches)<br>100%: Controls are conducted with clear methodology (e.g. risk-based approaches); publication of report. | Response       | Food Safety (3), Food Quality (1)               |

| Indicator                                                                                    | Description                                                                                                 | Scale                                                                                                                                                                                                                                                                                                              | DPSIR category | Subtheme (IMni)                                            |
|----------------------------------------------------------------------------------------------|-------------------------------------------------------------------------------------------------------------|--------------------------------------------------------------------------------------------------------------------------------------------------------------------------------------------------------------------------------------------------------------------------------------------------------------------|----------------|------------------------------------------------------------|
| <i>Local politics and administration:</i> <b>business controls food safety</b>               | The local administration controls food safety in businesses in the food sector.                             | 0%: No controls.<br>50%: Controls are conducted but without clear methodology.<br>75%: Controls are conducted with clear methodology (e.g. risk-based approaches)<br>100%: Controls are conducted with clear methodology (e.g. risk-based approaches); publication of report.                                      | Response       | Food Safety (3), Food Quality (1)                          |
| <i>Local politics and administration:</i> <b>drinking water control</b>                      | The local administration regularly conducts detailed controls of the city's drinking water.                 | 0%: No controls.<br>50%: Insufficient controls are conducted: Either less than daily or not all relevant parameters.<br>100%: Yes, controls are conducted often and in a detailed manner (biomonitoring, online analytics).                                                                                        | Response       | Food Safety (3), Food Quality (1)                          |
| <i>Public / public-private canteens:</i> <b>inclusion healthy diets in mission statement</b> | The public / public-private canteens commit themselves to catering healthy food in their mission statement. | 0%: Health diets not mentioned in mission statement / no mission statement.<br>50%: Yes, healthy diets mentioned in the mission statement for the whole business (not only catering).<br>100%: Yes, healthy diets mentioned in the mission statement of the canteen.                                               | Response       | Mission Statement (1), Food Quality (2), Public Health (1) |
| <i>Public / public-private canteens:</i> <b>measures to promote healthy diets</b>            | The public / public-private plan their menus by applying recognized nutritional standards/recommendations.  | 0%: No nutritional standards applied.<br>50%: In some cases, nutritional standards are applied (e.g. for a healthy menu) or the standards serve as an orientation but are not always strictly followed.<br>100%: The nutritional standards are applied for all menus (e.g. with the help of a dedicated software). | Response       | Food Quality (3), Public Health (2)                        |

| Indicator                                                                              | Description                                                                                                                               | Scale                                                                                                                                                                                                                                                                     | DPSIR category | Subtheme (IMni)                              |
|----------------------------------------------------------------------------------------|-------------------------------------------------------------------------------------------------------------------------------------------|---------------------------------------------------------------------------------------------------------------------------------------------------------------------------------------------------------------------------------------------------------------------------|----------------|----------------------------------------------|
| <i>Local politics and administration:</i> <b>controls of product labelling</b>         | The local administration controls the labelling (ingredients, claims etc.) of the products which can be bought within the city's borders. | 0%: Labelling of products is not controlled.<br>50%: Labelling of products is controlled, but either only ingredients labels or claims/sustainability labels.<br>100%: Labelling of products is controlled for both, ingredients labels and claims/sustainability labels. | Response       | Transparency (1), Product Information (3)    |
| <i>Local politics and administration:</i> <b>capacity building in direct marketing</b> | The local administration promotes trainings for direct marketing.                                                                         | 0%: No trainings for direct marketing promoted.<br>100%: Trainings for direct marketing promoted.                                                                                                                                                                         | Response       | Value Creation (2), Capacity Development (1) |
| <i>Local politics and administration:</i> <b>direct marketing opportunities</b>        | Regional producers are satisfied with direct marketing possibilities in Basel (e.g. urban farmer markets).                                | 0%: Not satisfied.<br>25%: Rather not satisfied.<br>50%: Rather satisfied.<br>75%: Satisfied.<br>100%: Very satisfied.                                                                                                                                                    | State          | Value Creation (1)                           |
| <i>Local politics and administration:</i> <b>promotion of regional products</b>        | The local administration promotes the consumption of regional products.                                                                   | 0%: No measures.<br>50%: Some measures.<br>100%: A multitude of measures which follow a clear strategy.                                                                                                                                                                   | Response       | Value Creation (1), Local Procurement (1)    |

| Indicator                                                                      | Description                                                               | Scale                                                                                                                                                                                                                        | DPSIR category | Subtheme (IMni)                                       |
|--------------------------------------------------------------------------------|---------------------------------------------------------------------------|------------------------------------------------------------------------------------------------------------------------------------------------------------------------------------------------------------------------------|----------------|-------------------------------------------------------|
| <i>Public / public-private canteens:</i> <b>promotion of regional products</b> | The public / public-private promote the consumption of regional products. | 0%: No promotion of regional products.<br>50%: Some measures to promote regional products.<br>100%: Wherever possible, regional products are promoted; the canteen has a clear strategy on how to promote regional products. | Response       | Value Creation (2,5), Local Procurement (2,5)         |
| <i>Public / public-private canteens:</i> <b>share of part-time jobs</b>        | Share of the part-time jobs in public / public-private canteens.          | 0%: 0-5%<br>25%: 5-15%<br>50%: 15 - 35%<br>75%: 35 - 50 %<br>100%: > 50%                                                                                                                                                     | State          | Quality of Life (2), Support to Vulnerable People (1) |
| <i>Public / public-private canteens:</i> <b>working hours</b>                  | Number of weekly working hours in public / public-private canteens.       | 0%: >55 weekly working hours<br>25%: 55-50 weekly working hours<br>50%: 50-45 weekly working hours<br>75%: 45-42 weekly working hours<br>100%: <= 42 weekly working hours                                                    | State          | Quality of Life (3)                                   |

| Indicator                                                                          | Description                                                                                                                                                  | Scale                                                                                                                                                                                                                                                                                                                                                                                                  | DPSIR category | Subtheme (IMni)                                       |
|------------------------------------------------------------------------------------|--------------------------------------------------------------------------------------------------------------------------------------------------------------|--------------------------------------------------------------------------------------------------------------------------------------------------------------------------------------------------------------------------------------------------------------------------------------------------------------------------------------------------------------------------------------------------------|----------------|-------------------------------------------------------|
| <i>Local politics and administration:</i> <b>working hours controls</b>            | The local administration controls the working hours in businesses in the food sector.                                                                        | 0%: No controls.<br><br>25%: Controls are conducted, but not on all type of businesses in the food sector.<br><br>50%: Controls are conducted on all type of businesses.<br><br>75%: Controls are conducted on all type of businesses (risk-based), following a concept.<br><br>100%: Controls are conducted on all type of businesses (risk-based) with the focus on work hours, following a concept. | Response       | Quality of Life (2),<br>Employment Relations (1)      |
| <i>Local politics and administration:</i> <b>reachability of fresh food stores</b> | The local administration assesses the reachability of the fresh food stores (fresh food mapping) and includes the results in their spatial planning process. | 0%: No studies on the reachability of fresh food stores.<br><br>50%: Studies commissioned.<br><br>100%: Results of the studies on reachability are included in the spatial planning process.                                                                                                                                                                                                           | Response       | Quality of Life (3), Support to Vulnerable People (2) |
| <i>Local politics and administration:</i> <b>promotion of capacity building</b>    | The local administration promotes further education for employees in the food sector.                                                                        | 0%: No further education promoted.<br><br>75%: Further education promoted for graduates or nongraduates.<br><br>100%: Further education promoted for graduates and nongraduates.                                                                                                                                                                                                                       | Response       | Capacity Development (3)                              |
| <i>Public / public-private canteens:</i> <b>further education</b>                  | Number of training days per person in public / public-private canteens.                                                                                      | 0%: < 0.5 days per year.<br><br>25%: < 0.5 - 1 days per year.<br><br>50%: 1 day per year.<br><br>75%: 2 days per year.<br><br>100%: > 2 days per year.                                                                                                                                                                                                                                                 | State          | Capacity Development (3)                              |

| Indicator                                                                                  | Description                                                                                                           | Scale                                                                                                                                                                                                                                                                                                                                                                                                                                                                                                                                                                                                        | DPSIR category | Subtheme (IMni)                                                                                     |
|--------------------------------------------------------------------------------------------|-----------------------------------------------------------------------------------------------------------------------|--------------------------------------------------------------------------------------------------------------------------------------------------------------------------------------------------------------------------------------------------------------------------------------------------------------------------------------------------------------------------------------------------------------------------------------------------------------------------------------------------------------------------------------------------------------------------------------------------------------|----------------|-----------------------------------------------------------------------------------------------------|
| <i>Local politics and administration:</i> <b>regional extension services</b>               | The local administration promotes extension services for regional farmers.                                            | 0%: No promotion of extension services.<br><br>100%: Promotion of extension services.                                                                                                                                                                                                                                                                                                                                                                                                                                                                                                                        | Response       | Stability of Production (1),<br>Capacity Development (2),<br>Fair Access to Means of Production (3) |
| <i>Local politics and administration:</i> <b>sustainable procurement: Own contribution</b> | The local administration includes sustainability in its public procurement strategy, law or terms and conditions.     | 0%: No public procurement strategy, no public procurement law.<br><br>25%: Aspects of sustainability are mentioned in the public procurement strategy / law but mainly focus on one dimension of sustainability.<br><br>50%: Sustainability is explicitly mentioned in the public procurement strategy / law.<br><br>75%: Aspects of sustainability relating to food are mentioned in the public procurement strategy / law but mainly focus on one dimension of sustainability.<br><br>100%: Sustainability relating to food is explicitly mentioned in the public procurement law or terms and conditions. | Response       | Due Diligence (1),<br>Responsible Buyers (3)                                                        |
| <i>Local politics and administration:</i> <b>sustainable procurement: scope</b>            | The local administration's public procurement law or terms and conditions also apply to private catering contractors. | 0%: No public procurement law or terms and conditions.<br><br>100%: The public procurement law or terms and conditions applies only in certain cases (e.g. due to financial thresholds).<br><br>100%: The public procurement law applies to all contracts with private businesses.                                                                                                                                                                                                                                                                                                                           | Response       | Due Diligence (1),<br>Responsible Buyers (3)                                                        |

| Indicator                                                                                     | Description                                                                            | Scale                                                                                                                                                                                                                                                                                                                                                                                                                                                                                                                                                                                                                                                                                                                                   | DPSIR category | Subtheme (IMni)                           |
|-----------------------------------------------------------------------------------------------|----------------------------------------------------------------------------------------|-----------------------------------------------------------------------------------------------------------------------------------------------------------------------------------------------------------------------------------------------------------------------------------------------------------------------------------------------------------------------------------------------------------------------------------------------------------------------------------------------------------------------------------------------------------------------------------------------------------------------------------------------------------------------------------------------------------------------------------------|----------------|-------------------------------------------|
| <i>Local politics and administration: sustainable procurement: verification of compliance</i> | The local administration controls the compliance with its public procurement criteria. | <p>0%: No sustainability criteria in public procurement; no controls of compliance.</p> <p>25%: In some cases, the bidder needs to hand in a signed self-assessment of its compliance with the public procurement criteria.</p> <p>50%: In some cases, the bidder needs to hand in a signed self-assessment of its compliance with the public procurement criteria.</p> <p>75%: In all cases, the bidder needs to hand in a signed self-assessment of its compliance with the public procurement criteria.</p> <p>100%: In some cases, the bidder needs to hand in a signed self-assessment of its compliance with the public procurement criteria. The self-assessment is controlled actively during the duration of the contract.</p> | Response       | Due Diligence (1), Responsible Buyers (3) |
| <i>Public / public-private canteens: share of fair trade bananas and coffee</i>               | Share of fair trade bananas and coffee in public / public-private canteens.            | [Indicator rating in %] = [average share in % of fair trade bananas and coffee/tea]                                                                                                                                                                                                                                                                                                                                                                                                                                                                                                                                                                                                                                                     | Response       | Responsible Buyers (3)                    |
| <i>Local politics and administration: fair trade town member</i>                              | The city is member of the fair trade town initiative.                                  | <p>0%: No membership.</p> <p>50%: No membership but implements similar measures (e.g. fair trade week)</p> <p>100%: Member of the fair trade town initiative.</p>                                                                                                                                                                                                                                                                                                                                                                                                                                                                                                                                                                       | Response       | Responsible Buyers (1)                    |



| Indicator                                                                                   | Description                                                                                               | Scale                                                                                                                                                                                                                                                                                                                                                                                            | DPSIR category | Subtheme (IMni)                                  |
|---------------------------------------------------------------------------------------------|-----------------------------------------------------------------------------------------------------------|--------------------------------------------------------------------------------------------------------------------------------------------------------------------------------------------------------------------------------------------------------------------------------------------------------------------------------------------------------------------------------------------------|----------------|--------------------------------------------------|
| <i>Local politics and administration: controls of employment relations</i>                  | The local administration controls the employment relations in businesses in the food sector.              | 0%: No controls.<br>25%: Controls are conducted, but not on all type of businesses in the food sector.<br>50%: Controls are conducted on all type of businesses.<br>75%: Controls are conducted on all type of businesses (risk-based), following a concept.<br>100%: Controls are conducted on all type of businesses (risk-based) with the focus on employment relations, following a concept. | Response       | Legitimacy (1),<br>Employment Relations (3)      |
| <i>Local politics and administration: regulations for agricultural employment contracts</i> | Local politics have defined legal requirements for contracts in agriculture.                              | 0%: No requirement for contracts in agriculture defined.<br>100%: Requirement for contracts in agriculture are defined.                                                                                                                                                                                                                                                                          | Response       | Quality of Life (1),<br>Employment Relations (3) |
| <i>Local politics and administration: public procurement criteria: ban on forced labour</i> | The local administration's public procurement law or terms and conditions contain a ban on forced labour. | 0%: No ban on forced labour in public procurement law or terms and conditions.<br>75%: Ban on forced labour in public procurement law or terms and conditions<br>100%: Ban on forced labour in public procurement law or terms and conditions. Additionally, bidders who are certified with an international employment standard such as SA8000 are preferred.                                   | Response       | Forced Labour (3)                                |
| <i>Local politics and administration: public procurement criteria: ban on child labour</i>  | The local administration's public procurement law or terms and conditions contain a ban on child labour.  | 0%: No ban on child labour in public procurement law or terms and conditions.<br>75%: Ban on child labour in public procurement law or terms and conditions<br>100%: Ban on child labour in public procurement law or terms and conditions. Additionally, bidders who are certified with an international employment standard such as SA8000 are preferred.                                      | Response       | Child Labour (3)                                 |

| Indicator                                                                                                                    | Description                                                                                                                           | Scale                                                                                                                                                                                                                                                                                                                                                                                                                                                                                                                                                                                                                                                                                                                                                                                          | DPSIR category | Subtheme (IMni)                                    |
|------------------------------------------------------------------------------------------------------------------------------|---------------------------------------------------------------------------------------------------------------------------------------|------------------------------------------------------------------------------------------------------------------------------------------------------------------------------------------------------------------------------------------------------------------------------------------------------------------------------------------------------------------------------------------------------------------------------------------------------------------------------------------------------------------------------------------------------------------------------------------------------------------------------------------------------------------------------------------------------------------------------------------------------------------------------------------------|----------------|----------------------------------------------------|
| <i>Local politics and administration:</i> <b>public procurement criteria: freedom of association and right to bargaining</b> | The local administration's public procurement law or terms and conditions contain criteria to ensure freedom and right to bargaining. | <p>0%: No inclusion of criteria to ensure freedom of association and right to bargaining in public procurement law or terms and conditions.</p> <p>75%: Inclusion of criteria to ensure freedom of association and right to bargaining in public procurement law or terms and conditions</p> <p>100%: Inclusion of criteria to ensure freedom of association and right to bargaining in public procurement law or terms and conditions. Additionally, bidders who are certified with an international employment standard such as SA8000 are preferred.</p>                                                                                                                                                                                                                                    | Response       | Freedom of Association and Right to Bargaining (3) |
| <i>Local politics and administration:</i> <b>public procurement criteria: non discrimination</b>                             | The local administration's public procurement law or terms and conditions contain criteria to ensure non discrimination.              | <p>0%: No inclusion of criteria to ensure non discrimination in procurement law or terms and conditions.</p> <p>25%: Some aspects of non discrimination are included in public procurement law or terms and conditions</p> <p>50%: The majority of aspect of non discrimination are included in public procurement law or terms and conditions</p> <p>75%: Inclusion of criteria to ensure non discrimination in public procurement law or terms and conditions (all aspects of non discrimination covered)</p> <p>100%: Inclusion of criteria to ensure non discrimination in public procurement law or terms and conditions (all aspects of non discrimination covered). Additionally, bidders who are certified with an international employment standard such as SA8000 are preferred.</p> | Response       | Non Discrimination (3)                             |
| <i>Public / public-private canteens:</i> <b>share of female canteen managers</b>                                             | Share of female canteen managers in public / public-private canteens.                                                                 | [Indicator rating in %] = [% of women canteen managers] x 2 (above 50% of women canteen managers, constant 100% indicator rating).                                                                                                                                                                                                                                                                                                                                                                                                                                                                                                                                                                                                                                                             | State          | Gender Equality (3)                                |

| Indicator                                                                                            | Description                                                                                                                   | Scale                                                                                                                                                                                                                                                                  | DPSIR category | Subtheme (IMni)                             |
|------------------------------------------------------------------------------------------------------|-------------------------------------------------------------------------------------------------------------------------------|------------------------------------------------------------------------------------------------------------------------------------------------------------------------------------------------------------------------------------------------------------------------|----------------|---------------------------------------------|
| <i>Public / public-private canteens: <b>equal pay</b></i>                                            | Public / public-private canteens have implemented equal pay.                                                                  | 0%: No data collection/evaluation of equal pay.<br>50%: Conducted data collection/evaluation of equal pay.<br>75%: Measures are implemented such as wage brackets.<br>100%: Internal transparency of pay.                                                              | Response       | Non Discrimination (1), Gender Equality (3) |
| <i>Local politics and administration: <b>subsidized food</b></i>                                     | The local administration subsidizes food for socially disadvantaged people.                                                   | 0%: No subsidies on food for socially disadvantaged people.<br>50%: Subsidies on food for socially disadvantaged people, but not enough supply of subsidized food.<br>100%: Subsidies on food for socially disadvantaged people with enough supply of subsidized food. | Response       | Support to Vulnerable People (3)            |
| <i>Local politics and administration: <b>promotion of occupational safety in the food sector</b></i> | The local administration promotes the occupational safety in the food sector by offering trainings and information brochures. | 0%: No promotion of occupational safety.<br>100%: Promotion of occupational safety but not for all types of businesses.<br>100%: Promotion of occupational safety but for all types of businesses (trainings, brochures etc.)                                          | Response       | Workplace Safety and Health Provisions (2)  |
| <i>Public / public-private canteens: <b>certificate of workplace safety</b></i>                      | Public / public-private have obtained an occupational safety certificate.                                                     | 0%: No certificate; no measures implemented.<br>50%: Concept and some internal measures implemented.<br>100%: The canteen has an occupational health certificate.                                                                                                      | Response       | Workplace Safety and Health Provisions (3)  |

| Indicator                                                                       | Description                                                                                                                                         | Scale                                                                                                                                                                                                                                                                                                                                                                                                                                                                                                                           | DPSIR category | Subtheme (IMni)                                                     |
|---------------------------------------------------------------------------------|-----------------------------------------------------------------------------------------------------------------------------------------------------|---------------------------------------------------------------------------------------------------------------------------------------------------------------------------------------------------------------------------------------------------------------------------------------------------------------------------------------------------------------------------------------------------------------------------------------------------------------------------------------------------------------------------------|----------------|---------------------------------------------------------------------|
| <i>Local politics and administration:</i> <b>promotion of healthy diets</b>     | The local administration promotes healthy diets by implementing suitable measures (e.g. recommendations for schools, public awareness rising etc.). | <p>0%: No promotion of healthy diets.</p> <p>50%: Some narrow scope measures like trainings how to buy fresh food, discussion panels.</p> <p>75%: Some narrow scope measures like trainings how to buy fresh food, discussion panels with a clear focus on target groups.</p> <p>100%: Wide scope measures with a clear focus on target groups (information campaigns, guidelines/projects for public schools, certification of public schools, provision of a healthy-diet label for restaurants, food stand, shops etc.).</p> | Response       | Support to Vulnerable People (1), Public Health (3)                 |
| <i>Local politics and administration:</i> <b>indigenous knowledge</b>           | The local administration lobbies within its limits of possibilities for the recognition and protection of indigenous knowledge.                     | <p>0%: No lobbying.</p> <p>50%: Some lobbying efforts.</p> <p>100%: The city used all the opportunities to lobby for the recognition and protection of indigenous knowledge.</p>                                                                                                                                                                                                                                                                                                                                                | Response       | Indigenous Knowledge (1)                                            |
| <i>Local politics and administration:</i> <b>promotion of allotment gardens</b> | The local administration promotes the growing of vegetables in allotment gardens.                                                                   | <p>0%: No promotion of growing vegetables in allotment gardens; no allotment gardens.</p> <p>50%: Provision of areas for allotment gardens.</p> <p>100%: Provision of areas for allotment gardens and trainings or information events on vegetable growing.</p>                                                                                                                                                                                                                                                                 | Response       | Quality of Life (1), Capacity Development (1), Food Sovereignty (3) |

| Indicator                                                                       | Description                                          | Scale                                                                                                                                                                                                                                                                                                                                                                                                                                                                                                                                                                                                                                            | DPSIR category | Subtheme (IMni)                                                                                               |
|---------------------------------------------------------------------------------|------------------------------------------------------|--------------------------------------------------------------------------------------------------------------------------------------------------------------------------------------------------------------------------------------------------------------------------------------------------------------------------------------------------------------------------------------------------------------------------------------------------------------------------------------------------------------------------------------------------------------------------------------------------------------------------------------------------|----------------|---------------------------------------------------------------------------------------------------------------|
| <i>Local politics and administration:</i> <b>promotion of community gardens</b> | The local administration promotes community gardens. | <p>0%: No promotion.</p> <p>25%: The city provides temporal areas for community gardens.</p> <p>50%: The city provides areas permanently designated for community gardening.</p> <p>100%: Besides proving areas for community gardens, the city promotes trainings, information and networking events.</p> <p>100%: Besides proving areas for community gardens, a contact person at the local administration in in charge to facilitate the exchange between the civil society initiatives and the local administration or the initiatives are financially supported on a regular basis to ensure the sustainable engagement of volunteers.</p> | Response       | Quality of Life (1), Capacity Development (1), Food Sovereignty (3), Civil society initiatives (not SAFA) (3) |
