# Supplementary material
Source: MDPI journal article supplement (https://www.mdpi.com/2071-1050/9/4/490)
Supplement: s1 [file s1]

**Table S1: Original and adapted subtheme goals.**

| Subtheme                         | Original SAFA subtheme goal                                                                                                                                                                                                                                                                                                                        | Adapted subtheme goal                                                                                                                                                                                                                                                                                                                                                       |
|----------------------------------|----------------------------------------------------------------------------------------------------------------------------------------------------------------------------------------------------------------------------------------------------------------------------------------------------------------------------------------------------|-----------------------------------------------------------------------------------------------------------------------------------------------------------------------------------------------------------------------------------------------------------------------------------------------------------------------------------------------------------------------------|
| <b>Good Governance</b>           |                                                                                                                                                                                                                                                                                                                                                    |                                                                                                                                                                                                                                                                                                                                                                             |
| Mission Statement                | The enterprise has made its commitment to all areas of sustainability clear to the public, to all personnel and other stakeholders through publishing a mission statement or other similar declaration (such as a code of conduct or vision statement) that is binding for management and employees or members.                                    | The city has made its commitment to all areas of sustainability clear to the public by including sustainability in the city's constitution or similar law (such as the general provisions in the city's code). Public canteens publish their sustainability principles in a mission statement or other similar declaration (such as a code of conduct or vision statement). |
| Due Diligence                    | The enterprise is pro-active in considering its external impacts before making decisions that have long-term impacts for any area of sustainability. This is accomplished through the enterprise following appropriate procedures such as risk assessment and others that ensure that stakeholders are informed, engaged and respected.            | The city has implemented structures to avoid negative external impacts related to its public food procurement or its investments into the agricultural sector.                                                                                                                                                                                                              |
| Holistic Audits                  | All areas of sustainability in the SAFA dimensions that pertain to the enterprise are monitored internally in an appropriate manner, and wherever possible are reviewed according to recognized sustainability reporting systems.                                                                                                                  | All relevant aspects of sustainable food which the city has influence on are mentioned in the city's sustainability report or similar documents.                                                                                                                                                                                                                            |
| Responsibility                   | Senior management and/or owners of enterprise regularly and explicitly evaluate the enterprise's performance against its mission or code of conduct.                                                                                                                                                                                               | Advancements in the area of sustainable food are assessed in the city's sustainability report or similar documents.                                                                                                                                                                                                                                                         |
| Transparency                     | All procedures, policies, decisions or decision-making processes are accessible where appropriate publicly, and made available to stakeholders including personnel and others affected by the enterprise's activities.                                                                                                                             | All activities, laws, ordinances and contracts with private caterers are accessible publicly. Public canteens publish the origin of their raw materials.                                                                                                                                                                                                                    |
| Stakeholder Dialogue             | The enterprise pro-actively identifies stakeholders, which include all those affected by the activities of the enterprise (including any stakeholders unable to claim their rights), and ensures that all are informed, engaged in critical decision making, and that their input is duly considered.                                              | The city pro-actively identifies stakeholders in the food system, which include all those affected by the activities of the city (including any stakeholders unable to claim their rights) and ensures, that all are informed, engaged in critical decision making, and that their input is duly considered.                                                                |
| Grievance Procedures             | All stakeholders (including as stated above, those who cannot claim their rights, personnel, and any stakeholders in or outside of the enterprise) have access to appropriate grievance procedures, without a risk of negative consequences.                                                                                                       | All stakeholders in the food system have access to appropriate extrajudicial grievance procedures, without a risk of negative consequences.                                                                                                                                                                                                                                 |
| Conflict Resolution              | Conflicts between stakeholder interests and the enterprise's activities are resolved through collaborative dialogue (i.e. arbitrated, mediated, facilitated, conciliated or negotiated), based on respect, mutual understanding and equal power.                                                                                                   | Conflicts between private stakeholders in the food system and the city are resolved through collaborative dialogue (i.e. arbitrated, mediated, facilitated, conciliated or negotiated), based on respect, mutual understanding and equal power.                                                                                                                             |
| Legitimacy                       | The enterprise is compliant with all applicable laws, regulations and standards voluntarily entered into by the enterprise (unless as part of an explicit campaign of non-violent civil disobedience or protest) and international human rights standards (whether legally obligated or not).                                                      | The city complies with the food-related duties defined in its law and acts within its legal limits.                                                                                                                                                                                                                                                                         |
| Remedy, Restoration & Prevention | In case of any legal infringements or any other identified breach of legal, regulatory, international human rights, or voluntary standard, the enterprise immediately puts in place an effective remedy and adequate actions for restoration and further prevention are taken.                                                                     | Not applicable.                                                                                                                                                                                                                                                                                                                                                             |
| Civic Responsibility             | Within its sphere of influence, the enterprise supports the improvement of the legal and regulatory framework on all dimensions of sustainability and does not seek to avoid the impact of human rights, or sustainability standards, or regulation through the corporate veil, relocation, or any other means.                                    | The city advocates sustainable food also outside its territory.                                                                                                                                                                                                                                                                                                             |
| Resource Appropriation           | Enterprises do not reduce the existing rights of communities to land, water and resources, and operations are carried after informing affected communities by providing information, independent advice and building capacity to self-organize for the purposes of representation.                                                                 | The city does not reduce the existing rights of communities to land, water and resources. Public financial investments are accordingly reviewed and where these principles cannot be guaranteed not carried out.                                                                                                                                                            |
| Sustainability Management Plan   | A sustainability plan for the enterprise is developed which provides a holistic view of sustainability and considers synergies and trade-offs between dimensions, including each of the environmental, economic, social and governance dimensions.                                                                                                 | The city defines a strategy for a sustainable food system or includes the topic food in their sustainability strategy. The strategy considers synergies and trade-offs between dimensions, including each of the environmental, economic, social and governance dimensions.                                                                                                 |
| Full-Cost Accounting             | The business success of the enterprise is measured and reported taking into account direct and indirect impacts on the economy, society and physical environment (e.g. triple bottom line reporting), and the accounting process makes transparent both direct and indirect subsidies received, as well as direct and indirect costs externalized. | The city estimates the direct and indirect impacts of the urban food consumption on the economy, society and the physical environment.                                                                                                                                                                                                                                      |

| Subtheme                       | Original SAFA subtheme goal                                                                                                                                                                                        | Adapted subtheme goal                                                                                                                                                                           |
|--------------------------------|--------------------------------------------------------------------------------------------------------------------------------------------------------------------------------------------------------------------|-------------------------------------------------------------------------------------------------------------------------------------------------------------------------------------------------|
| <b>Environmental Integrity</b> |                                                                                                                                                                                                                    |                                                                                                                                                                                                 |
| Greenhouse Gases               | The emission of GHG is contained.                                                                                                                                                                                  | The emission of GHG connected to the urban food system is contained.                                                                                                                            |
| Air Quality                    | The emission of air pollutants is prevented and ozone depleting substances are eliminated.                                                                                                                         | The emission of air pollutants connected to the urban food system is limited and ozone depleting substances are eliminated.                                                                     |
| Water Withdrawal               | Withdrawal of ground and surface water and/or use does not impair the functioning of natural water cycles and ecosystems and human, plant and animal communities.                                                  | The water footprint of the urban food consumption does not impact the functioning of natural water cycles and ecosystems and human, plant and animal communities.                               |
| Water Quality                  | The release of water pollutants is prevented and water quality is restored.                                                                                                                                        | The release of water pollutants connected to the urban food system is prevented and water quality restored in order to eliminate the potential hazards for human, plant and animal communities. |
| Soil Quality                   | Soil characteristics provide the best conditions for plant growth and soil health, while chemical and biological soil contamination is prevented.                                                                  | The urban food system promotes soil characteristics which provide the best conditions for plant growth and soil health, while chemical and biological soil contamination is prevented.          |
| Land Degradation               | No land is lost through soil degradation and desertification and degraded land is rehabilitated.                                                                                                                   | The city and the urban food system counteract land losses through soil degradation, desertification, or soil sealing.                                                                           |
| Ecosystem Diversity            | The diversity, functional integrity and connectivity of natural, semi-natural and agrifood ecosystems are conserved and improved.                                                                                  | The urban food system conserves and improves the diversity, functional integrity and connectivity of natural, semi-natural and agrifood ecosystems.                                             |
| Species Diversity              | The diversity of wild species living in natural and semi-natural ecosystems, as well as the diversity of domesticated species living in agricultural, forestry and fisheries ecosystems is conserved and improved. | The urban food system conserves and improves the diversity, functional integrity and connectivity of natural, semi-natural and agrifood ecosystems.                                             |
| Genetic Diversity              | The diversity of populations of wild species, as well as the diversity of varieties, cultivars and breeds of domesticated species, is conserved and improved.                                                      | The urban food system conserves and improves the diversity of varieties, cultivars and breeds of domesticated species.                                                                          |
| Material Use                   | Material consumption is minimized and reuse, recycling and recovery rates are maximized.                                                                                                                           | Material consumption which is connected to the urban food system is minimized and reuse, recycling and recovery rates are maximized.                                                            |
| Energy Use                     | Overall energy consumption is minimized and use of sustainable renewable energy is maximized.                                                                                                                      | Overall energy consumption which is connected to the urban food system is minimized and use of sustainable renewable energy is maximized.                                                       |
| Waste Reduction & Disposal     | Waste generation is prevented and is disposed of in a way that does not threaten the health of humans and ecosystems and food loss/waste is minimized.                                                             | Waste generation which is connected to the urban food system is prevented. Food loss/waste is minimized.                                                                                        |
| Animal Health                  | Animals are kept free from hunger and thirst, injury and disease.                                                                                                                                                  | The urban food system promotes that animals are kept free from hunger and thirst, injury and disease.                                                                                           |
| Freedom from Stress            | Animals are kept under species-appropriate conditions and free from discomfort, pain, injury and disease, fear and distress.                                                                                       | The urban food system promotes that animals are kept under species-appropriate conditions and free from discomfort, pain, injury and disease, fear and distress.                                |

| Subtheme                   | Original SAFA subtheme goal                                                                                                                                                                                                  | Adapted subtheme goal                                                                                                                               |
|----------------------------|------------------------------------------------------------------------------------------------------------------------------------------------------------------------------------------------------------------------------|-----------------------------------------------------------------------------------------------------------------------------------------------------|
| <b>Economic Resilience</b> |                                                                                                                                                                                                                              |                                                                                                                                                     |
| Internal Investment        | In a continuous, foresighted manner, the enterprise invests into enhancing its sustainability performance.                                                                                                                   | In a continuous, foresighted manner, the city promotes improvements in sustainability of the urban food system.                                     |
| Community Investment       | Through its investments, the enterprise contributes to sustainable development of a community.                                                                                                                               | Through its financial support, the city generally promotes sustainable food.                                                                        |
| Long-Ranging Investment    | Investments into production facilities, resources, market infrastructure, shares and acquisitions aim at long-term sustainability rather than maximum short-term profit.                                                     | Not applicable.                                                                                                                                     |
| Profitability              | Through its investments and business activities, the enterprise has the capacity to generate a positive net income.                                                                                                          | Not applicable.                                                                                                                                     |
| Stability of Production    | Production (quantity and quality) is sufficiently resilient to withstand and be adapted to environmental, social and economic shocks.                                                                                        | The regional stability of production is promoted by the urban food system.                                                                          |
| Stability of Supply        | Stable business relationships are maintained with a sufficient number of input suppliers and alternative procurement channels are accessible.                                                                                | Not applicable.                                                                                                                                     |
| Stability of Market        | Stable business relationships are maintained with a sufficient number of buyers, income structure is diversified and alternative marketing channels are accessible.                                                          | Not applicable.                                                                                                                                     |
| Liquidity                  | Financial liquidity, access to credits and insurance (formal and informal) against economic, environmental and social risk enable the enterprise to withstand shortfalls in payment.                                         | Not applicable.                                                                                                                                     |
| Risk Management            | Strategies are in place to manage and mitigate the internal and external risks (i.e. price, production, market, credit, workforce, social, environmental) that the enterprise could face to withstand their negative impact. | The city ensures the access to food and drinking water in case of emergency.                                                                        |
| Food Safety                | Food hazards are systematically controlled and any contamination of food with potentially harmful substances is avoided.                                                                                                     | Food hazards are systematically controlled by the city and any contamination of food with potentially harmful substances is avoided.                |
| Food Quality               | The quality of food products meets the highest nutritional standards applicable to the respective type of product.                                                                                                           | The urban food system promotes the quality of food products to meet the highest nutritional standards applicable to the respective type of product. |
| Product Information        | Products bear complete information that is correct, by no means misleading and accessible for consumers and all members of the food chain.                                                                                   | The city ensures that products bear complete information that is correct.                                                                           |
| Value Creation             | Enterprises benefit local economies through employment and through payment of local taxes.                                                                                                                                   | The city promotes the direct marketing of regional products.                                                                                        |
| Local Procurement          | Enterprises substantially benefit local economies through procurement from local suppliers.                                                                                                                                  | Urban food consumption promotes the sales of regional products.                                                                                     |

| Subtheme                                       | Original SAFA subtheme goal                                                                                                                                                                                                                                                                                                                                                                                                          | Adapted subtheme goal                                                                                                                                                                                                                                                                                                                                  |
|------------------------------------------------|--------------------------------------------------------------------------------------------------------------------------------------------------------------------------------------------------------------------------------------------------------------------------------------------------------------------------------------------------------------------------------------------------------------------------------------|--------------------------------------------------------------------------------------------------------------------------------------------------------------------------------------------------------------------------------------------------------------------------------------------------------------------------------------------------------|
| <b>Social Well-Being</b>                       |                                                                                                                                                                                                                                                                                                                                                                                                                                      |                                                                                                                                                                                                                                                                                                                                                        |
| Quality of Life                                | All producers and employees in enterprises of all scales enjoy a livelihood that provides a culturally appropriate and nutritionally adequate diet and allows time for family, rest and culture.                                                                                                                                                                                                                                     | Regional primary producers and staff of public canteens enjoy a livelihood that allows time for family, rest and culture. Consumers enjoy an appropriate and nutritionally adequate diet.                                                                                                                                                              |
| Capacity Development                           | Through training and education, all primary producers and personnel have opportunities to acquire the skills and knowledge necessary to undertake current and future tasks required by the enterprise, as well as the resources to provide for further training and education for themselves and members of their families.                                                                                                          | The city offers training and education possibilities for employees in the food sector and regional primary producers.                                                                                                                                                                                                                                  |
| Fair Access to Means of Production             | Primary producers have access to the means of production, including equipment, capital and knowledge.                                                                                                                                                                                                                                                                                                                                | The city enables regional primary producers the access to the means of production, including equipment, capital and knowledge.                                                                                                                                                                                                                         |
| Responsible Buyers                             | The enterprise ensures that a fair price is established through negotiations with suppliers that allow them to earn and pay their own employees a living wage, and cover their costs of production, as well as maintain a high level of sustainability in their practices. Negotiations and contracts (verbal or written) are transparent, based on equal power, terminated only for just cause, and terms are mutually agreed upon. | The city ensures for publicly procured products originating from newly industrialized or developing countries that the farmers receive a fair price for them.                                                                                                                                                                                          |
| Rights of Suppliers                            | The enterprises negotiating a fair price explicitly recognize and support in good faith suppliers' rights to freedom of association and collective bargaining for all contracts and agreements.                                                                                                                                                                                                                                      | Not applicable.                                                                                                                                                                                                                                                                                                                                        |
| Employment Relations                           | Enterprises maintain legally-binding transparent contracts with all employees that are accessible and cover the terms of work and employment is compliant with national laws on labour and social security.                                                                                                                                                                                                                          | The city ensures within its sphere of influence that employees in the food sector (incl. regional primary producers) have legally-binding transparent contracts. These cover the terms of work and employment and are compliant with national laws on labour and social security.                                                                      |
| Forced Labour                                  | The enterprise accepts no forced, bonded or involuntary labour, neither in its own operations nor those of business partners.                                                                                                                                                                                                                                                                                                        | The city does not accept forced, bonded or involuntary labour in the supply chain of their publicly procured food products.                                                                                                                                                                                                                            |
| Child Labour                                   | The enterprise accepts no child labour that has a potential to harm the physical or mental health or hinder the education of minors, neither in its own operations nor those of business partners.                                                                                                                                                                                                                                   | The city does not accept child labour that has a potential to harm the physical or mental health or hinder the education of minors in the supply chain of their publicly procured food products.                                                                                                                                                       |
| Freedom of Association and Right to Bargaining | All persons in the enterprise can freely execute the rights to: negotiate the terms of their employment individually or as a group; form or adhere to an association defending workers' rights; and collectively bargain, without retribution.                                                                                                                                                                                       | The city ensures for the supply chain of their publicly procured food that all involved persons can freely execute the following rights with no risk of negative consequences: (i) negotiate the terms of their employment individually or as a group, (ii) form or adhere to an association defending workers' rights and (iii) collectively bargain. |
| Non Discrimination                             | A strict equity and non-discrimination policy is pursued towards all stakeholders; non-discrimination and equal opportunities are explicitly mentioned in enterprise hiring policies, employee or personnel policies (whether written or verbal or code of conduct) and adequate means for implementation and evaluation are in place.                                                                                               | The city applies strict rules for the supply chain of their publicly procured food products concerning equal opportunities and non-discrimination.                                                                                                                                                                                                     |
| Gender Equality                                | There is no gender disparity concerning hiring, remuneration, access to resources, education and career opportunities.                                                                                                                                                                                                                                                                                                               | The city does not accept gender disparity concerning hiring, remuneration, access to resources, education and career opportunities in the supply chain of their publicly procured food products.                                                                                                                                                       |
| Support to Vulnerable People                   | Vulnerable groups, such as young or elderly employees, women, the disabled, minorities and socially disadvantaged are proactively supported.                                                                                                                                                                                                                                                                                         | The city promotes for people with no or irregular income within its sphere of influence healthy diet by distributing food and knowledge brokering.                                                                                                                                                                                                     |
| Workplace Safety and Health Provisions         | The enterprise ensures that the workplace is safe, has met all appropriate regulations, and caters to the satisfaction of human needs in the provision of sanitary facilities, safe and ergonomic work environment, clean water, healthy food, and clean accommodation (if offered).                                                                                                                                                 | The city ensured within its sphere of influence that employees in the food sector (incl. regional primary producers) have a safe workplace which complies with all applicable safety standards and rules.                                                                                                                                              |
| Public Health                                  | The enterprise ensures that operations and business activities do not limit the healthy and safe lifestyles of the local community and contributes to community health resources and services.                                                                                                                                                                                                                                       | The urban food system promotes a healthy diet.                                                                                                                                                                                                                                                                                                         |
| Indigenous Knowledge                           | Intellectual property rights related to traditional and cultural knowledge are protected and recognized.                                                                                                                                                                                                                                                                                                                             | The city advocates within its political possibilities for the protection and recognition of intellectual property rights related to traditional and cultural knowledge.                                                                                                                                                                                |
| Food Sovereignty                               | The enterprise contributes to, and benefits from, exercising the right to choice and ownership of their production means, specifically in the preservation and use of traditional, heirloom and locally adapted varieties or breeds.                                                                                                                                                                                                 | The city promotes the food production in urban gardening.                                                                                                                                                                                                                                                                                              |
| Civil society initiatives (non-SAFA)           | -                                                                                                                                                                                                                                                                                                                                                                                                                                    | The city promotes food-related civil society initiatives.                                                                                                                                                                                                                                                                                              |
